# Supplementary material
Source: publisher site journal article supplement (https://www.dovepress.com/get_supplementary_file.php?f=222572.xlsx)
Supplement: Supplementary file 1 [file get_supplementary_file.php]

## Sheet: Identified SNPs
Chr	Start	End	avsnp147	Ref	Alt	Func.refGene	Gene.refGene	GeneDetail.refGene	ExonicFunc.refGene	AAChange.refGene	cytoBand	ExAC_ALL	ExAC_AFR	ExAC_AMR	ExAC_EAS	ExAC_FIN	ExAC_NFE	ExAC_OTH	ExAC_SAS	1000 Genomes	GO-ESP	TOPMED	SIFT_pred	Polyphen2_HDIV_score	Polyphen2_HDIV_pred	Polyphen2_HVAR_score	Polyphen2_HVAR_pred	LRT_score	LRT_pred	MutationTaster_score	MutationTaster_pred	MutationAssessor_score	MutationAssessor_pred	FATHMM_score	FATHMM_pred	PROVEAN_score	PROVEAN_pred	VEST3_score	CADD_raw	CADD_phred	DANN_score	fathmm-MKL_coding_score	fathmm-MKL_coding_pred	MetaSVM_score	MetaSVM_pred	MetaLR_score	MetaLR_pred	integrated_fitCons_score	integrated_confidence_value
3	37034946	37034946	rs1800734	G	A	UTR5	MLH1	NM_001258273:c.-21023G>A;NM_000249:c.-93G>A;NM_001258271:c.-93G>A	.	.	3p22.2	.	.	.	.	.	.	.	.	0.32		0.2411	.	.	.	.	.	.	.	.	.	.	.	.	.	.	.	.	.	.	.	.	.	.	.	.	.	.	.
2	47601106	47601106	rs1126497	T	C	exonic	EPCAM	.	nonsynonymous SNV	EPCAM:NM_002354:exon3:c.T344C:p.M115T	2p21	0.5198	0.8345	0.4629	0.8267	0.6097	0.4396	0.5121	0.4887	0.334	0.4333	0.412	T	0	B	0	B	0.06	N	1	P	-0.895	N	0.05	T	2.27	N	0.48	-0.486	0.238	0.739	0.076	N	-0.934	T	0	T	0.778	0
1	45805566	45805566	rs3219468	G	C	UTR5	MUTYH	NM_025077:c.-359G>C	.	.	1p34.1	0.9879	0.9971	0.9891	1	0.9881	0.9822	0.9933	0.9951	0.994	.	0.9903	.	.	.	.	.	.	.	.	.	.	.	.	.	.	.	.	.	.	.	.	.	.	.	.	.	.	.
2	47637286	47637286	rs1114167810	-	A	exonic	MSH2	.	frameshift insertion	MSH2:NM_000251:exon3:c.421dupA:p.D140fs,MSH2:NM_001258281:exon4:c.223dupA:p.D74fs	2p21	.	.	.	.	.	.	.	.			.	.	.	.	.	.	.	.	.	.	.	.	.	.	.	.	.	.	.	.	.	.	.	.	.	.	.	.
10	89623861	89623861	rs71022512	T	-	splicing	PTEN	NM_001304717:exon1:c.154+1T>-;NM_001304717:exon2:c.155-1T>-	.	.	10q23.31	.	.	.	.	.	.	.	.			.	.	.	.	.	.	.	.	.	.	.	.	.	.	.	.	.	.	.	.	.	.	.	.	.	.	.	.
10	89726660	89726672	rs5786797	TTTTTTTTTTTTT	-	UTR3	PTEN	NM_001304718:c.*1431_*1443delTTTTTTTTTTTTT;NM_001304717:c.*1431_*1443delTTTTTTTTTTTTT;NM_000314:c.*1431_*1443delTTTTTTTTTTTTT	.	.	10q23.31	.	.	.	.	.	.	.	.			.	.	.	.	.	.	.	.	.	.	.	.	.	.	.	.	.	.	.	.	.	.	.	.	.	.	.	.
7	6012456	6012458	rs374762935	TTT	-	UTR3	PMS2	NM_001322010:c.*574_*572delAAA;NM_001322009:c.*574_*572delAAA;NM_001322008:c.*574_*572delAAA;NM_001322007:c.*574_*572delAAA;NM_001322006:c.*574_*572delAAA;NM_001322005:c.*574_*572delAAA;NM_001322004:c.*574_*572delAAA;NM_001322003:c.*574_*572delAAA;NM_001322015:c.*574_*572delAAA;NM_001322014:c.*574_*572delAAA;NM_001322013:c.*574_*572delAAA;NM_001322012:c.*574_*572delAAA;NM_001322011:c.*574_*572del…	.	.	7p22.1	.	.	.	.	.	.	.	.			.	.	.	.	.	.	.	.	.	.	.	.	.	.	.	.	.	.	.	.	.	.	.	.	.	.	.	.
[truncated: 8 more columns]

## Sheet: Results of Sanger sequence
Gene.refGene	avsnp147	Ref	Alt	patient
				II-3	III-1	III-3	III-5	III-6	III-7	III-8	III-9	III-11	III-14	III-16	III-18	III-20	III-22	III-24	III-26	III-32	III-34	III-36	III-38	III-40	IV-1	IV-3	IV-4	IV-5	IV-6	IV-7	IV-10	IV-15	IV-16	IV-17	IV18	IV19	IV-20	IV-21	IV-22	IV-23	IV-24	IV-25	IV-26	IV-27	IV-28	IV-29	IV-31	IV-32	IV-34
MSH2	rs1114167810	-	A	het	wt	het	het	wt	wt		het	wt	wt	het	het	het	het	het	het	wt	wt	wt	wt	wt	wt	het	het	wt		wt	het	wt	het	het	wt	het	het	wt	het	het	wt	wt	wt	wt	wt	wt	wt	wt	wt
MLH1	rs1800734	G	A	hom	het	het	het						het	het	het	hom	het	het	het			het		het	het		het		het				het							het	het
EPCAM	rs1126497	T	C
MUTYH	rs3219468	G	C	hom			hom						hom	hom				hom							hom				hom				hom							hom
PTEN	rs71022512	T	-	hom	hom		hom						hom	hom				hom							hom				hom				hom							hom
PTEN	rs5786797	TTTTTTTTTTTTT	-	het	het		het						het	het				het							het				het				het							het
PMS2	rs765512864	A	-	het	wt		wt						het	het				het				het		het	het				het				het							het
Wt wild type, Het heterozygous mutation, Hom homozygous mutation
[truncated: 5 more columns]

## Sheet: Primers used in this study
RS_ID	F-primer	R-primer
rs1800734	TGGGCGTCATCCACATTCTG	TCCCTCCGTACCAGTTCTCAATC
rs1126497	CTTCTTTAATTGATGTGCCTTGAGTTG	TGGAGGTCCAATGGGTAGCGA
rs3219468	CTGCGGGAGCTGAAACTGCG	CCTTCCTCGCCATCCATACTGC
rs1114167810	GCTTCTCCTGGCAATCTCTCTCAGT	GGCCTGGAATCTCCTCTATCACTAGA
rs71022512	CTGGACCGCAGCCGGGTAAT	AGAGTTGGTCTCTCCCCTTCTACTG
rs5786797	CTGTCAGCCGTTCCACCCT	GTGAACAATTTCAGCACCAATAAG
rs374762935	AGTCATTTTCTTCCAGCCGG	GAGACGGAGGTTGCAGTGAA
Site directed mutagenesis	CAATGGAAGCTGACATAATCATTGTTACCAAAGAGAATGTCTTCAAA	TTTGAAGACATTCTCTTTGGTAACAATGATTATGTCAGCTTCCATTG
